# Supplementary material
Source: HighWire-hosted journal article supplement (https://www.rcpjournals.org/highwire/filestream/7152/field_highwire_adjunct_files/0/CMJ1301-Posadzki_Supplementary_Tables.pdf)
Supplement: CMJ1301-Posadzki_Supplementary_Tables.pdf [file CMJ1301-Posadzki_Supplementary_Tables.pdf]

Table S1. Key data from included systematic reviews.

| Author (year)                  | Country | Herbal medicine evaluated                          | Type of safety concerns           | Primary data                                                |                 |                                             |                                  | AEs              |                      |                                                                                                                               |                      | First authors' degree/background                                | Conflict of interest declared | Source of funding |               |                                                    |
|--------------------------------|---------|----------------------------------------------------|-----------------------------------|-------------------------------------------------------------|-----------------|---------------------------------------------|----------------------------------|------------------|----------------------|-------------------------------------------------------------------------------------------------------------------------------|----------------------|-----------------------------------------------------------------|-------------------------------|-------------------|---------------|----------------------------------------------------|
|                                |         |                                                    |                                   | Clinical conditions                                         | Range (N* (n†)) | Type                                        | Meta-analysis <sup>1</sup> of SR | Overall judgment | Type                 | Duration                                                                                                                      | Frequency            |                                                                 |                               |                   | Severity      |                                                    |
| Agababika (2009) <sup>12</sup> |         | Saw palmetto ( <i>Serenoa repens</i> )             | AEs                               | BPH<br>Lower UTI                                            | >100 (~773)     | CRs<br>CS<br>NRCTs<br>RCTs<br>UCT           | No                               | 5                | Mild to moderate AEs | Abdominal pain<br>Cerebral haemorrhage<br>Death<br>Decreased libido<br>Diarrhoea<br>Fatigue<br>Headache<br>Nausea<br>Rhinitis | NM                   | 39 GI upset                                                     | Mild to severe                | PhD               | None declared | Fellowship from Dr Willmar Schwabe Pharmaceuticals |
| Basch (2003) <sup>9</sup>      | USA     | Alfalfa ( <i>Medicago sativa</i> )                 | AEs Drug interactions<br>Toxicity | Diabetes<br>Hyperlipidaemia                                 | <10 (~26)       | CR<br>CS                                    | No                               | 2                | Mild to moderate AEs | Bacterial infections<br>Dermatitis<br>Diarrhoea<br>GI upset<br>Lupus-like syndrome<br>Pancytopenia                            | NM                   | 15 GI upset                                                     | Mild to severe                | MD                | NM            | Privately funded                                   |
| Basch (2004) <sup>13</sup>     | USA     | Thyme ( <i>Thymus vulgaris</i> )                   | AEs Drug interactions<br>Toxicity | Alopecia areata<br>Bronchitis<br>Cough                      | <10 (~10)       | RCT<br>SRS                                  | No                               | -5               | Only mild AEs        | Allergic response<br>Dizziness<br>Headache<br>Hypotension                                                                     | NM                   | 4 ASR                                                           | Mild                          | MD                | NM            | NM                                                 |
| Basch (2004) <sup>14</sup>     | USA     | Lavender ( <i>Lavandula angustifolia</i> Miller)   | AEs Drug interactions<br>Toxicity | Anxiety<br>Cancer                                           | <10 (~7)        | CS<br>NRCT<br>RCTs                          | No                               | -5               | Only mild AEs        | Anorexia<br>Nausea<br>Reversible neutropenia<br>Vomiting                                                                      | NM                   | 4 ASR<br>2 GI upset                                             | Mild                          | MD                | NM            | NM                                                 |
| Basch (2004) <sup>15</sup>     | USA     | Boswellia ( <i>Boswellia serrata</i> )             | AEs Drug interactions<br>Toxicity | Asthma<br>Crohn's disease<br>OA<br>RA<br>Ulcerative colitis | <100 (~24)      | Comparison study<br>NRCTs<br>RCTs<br>Review | No                               | -5               | Only mild AEs        | Abdominal fullness<br>Diarrhoea<br>Epigastric pain<br>GI upset<br>Nausea and acid reflux                                      | NM                   | 20 GI upset<br>4 ASR                                            | Mild                          | MD                | NM            | NM                                                 |
| Basch (2006) <sup>16</sup>     | USA     | Calendula ( <i>Calendula officinalis</i> )         | AEs Drug interactions<br>Toxicity | Otitis media<br>Radiation dermatitis<br>Wound healing       | <10 (~10)       | Comparison study<br>CS<br>RCTs              | No                               | 0                | Only mild AEs        | Difficulties experienced but no further information                                                                           | NM                   | 9 allergy                                                       | Mild                          | MD                | NM            | NM                                                 |
| Borelli (2008) <sup>18</sup>   | Italy   | Black cohosh ( <i>Cimicifuga racemosa</i> )        | AEs Safety                        | Menopausal symptoms                                         | <100 (~851)     | CS<br>NRCTs<br>RCTs<br>SRS                  | No                               | 5                | Mild to moderate AEs | Acute hepatitis<br>GI upset<br>Multorgan failure<br>Rash                                                                      | 2 weeks<br>-3 months | ~28 GI upset<br>~18 ASR                                         | Mild to severe                | Pharmacology      | NM            | NM                                                 |
| Brendler (2006) <sup>17</sup>  | Germany | Devil's claw ( <i>Harpagophytum procumbens</i> DC) | AEs Drug interactions<br>Toxicity | Rheumatic conditions                                        | >10 (~78)       | CS<br>RCTs                                  | No                               | 0                | Only mild AEs        | Allergy<br>Diarrhoea                                                                                                          | NM                   | 5 GI upset                                                      | Mild                          | Ethnobotany       | NM            | NM                                                 |
| Coon (2002) <sup>18</sup>      | UK      | Ginseng ( <i>Panax ginseng</i> )                   | AEs Drug interactions             | Healthy individuals<br>Various clinical conditions          | >100 (~674)     | CRs<br>Epidemiology studies<br>RCTs<br>SRS  | No                               | 2                | Only mild AEs        | Anxiety<br>Burning sensation<br>Cold/flu<br>GI disorder<br>Headache<br>Insomnia<br>Pain<br>Skin problem<br>Sleep problem      | 10 days of headache  | 135 GI upset<br>130 burning sensation<br>36 cold<br>10 headache | Mild                          | PhD               | NM            | Fellowship from Pharmaton SA, Lugano, Switzerland  |
| Daniele (2005) <sup>19</sup>   | Italy   | Verbenaceae ( <i>Vitex agnus-castus</i> )          | AEs                               | Various clinical conditions                                 | <100 (~517)     | CRs<br>CS<br>RCTs<br>SRS<br>Surveys         | No                               | 5                | Only mild AEs        | Acne<br>Erythematous rash<br>GI disturbance<br>Headache<br>Menstrual disorder<br>Nausea<br>Pruritus                           | NM                   | 129 GI upset<br>120 ASR<br>60 gynaecological problem            | Mild                          | Pharmacology      | None declared | None declared                                      |

Continues

Table S1. Continued

| Author (year)                   | Country | Type of safety concerns              | Herbal medicine evaluated                         | Primary data                                                                                                |                   |                                                                   | AEs                   |                  |                                                                     | First authors' degree/background                                                                                                                               | Conflict of interest                                                     | Source of funding |                                     |               |                                                                                                   |
|---------------------------------|---------|--------------------------------------|---------------------------------------------------|-------------------------------------------------------------------------------------------------------------|-------------------|-------------------------------------------------------------------|-----------------------|------------------|---------------------------------------------------------------------|----------------------------------------------------------------------------------------------------------------------------------------------------------------|--------------------------------------------------------------------------|-------------------|-------------------------------------|---------------|---------------------------------------------------------------------------------------------------|
|                                 |         |                                      |                                                   | Clinical conditions                                                                                         | Range (N* (n†))   | Type                                                              | Meta-analysis?† of SR | Overall judgment | Type                                                                |                                                                                                                                                                |                                                                          |                   | Duration                            | Frequency     | Severity                                                                                          |
| Daniele (2006) <sup>20</sup>    | Italy   | AEs                                  | Hawthorn ( <i>Crataegus spp.</i> )                | CHF                                                                                                         | <100 (~204)       | Cohort study<br>OS<br>RCTs<br>UCT                                 | No                    | 5                | Only mild AEs                                                       | Circulation failure<br>Dizziness/vertigo<br>Erythematous rash<br>GI complaint<br>GI haemorrhage<br>Headache<br>Migraine and palpitation<br>Nausea              | 104 weeks<br>33 GI upset<br>21 dizziness/vertigo<br>17 headache/migraine | Mild to moderate  | Pharmacology/physiology             | None declared | None declared                                                                                     |
| Dugoua (2007) <sup>21</sup>     | Canada  | AEs<br>Drug interaction<br>Toxicity  | Cinnamon bark ( <i>Cinnamomum spp.</i> )          | Chronic salmonellosis<br><i>Helicobacter pylori</i> infection<br>Oral candidiasis<br>HIV<br>Type 2 diabetes | <10 (~55)         | CR<br>CS<br>OS<br>RCT                                             | No                    | 3                | Only mild AEs                                                       | Allergic reaction<br>Diarrhoea<br>Dizziness<br>Loss of consciousness<br>Mouth burning<br>syndrome<br>Skin irritation<br>Stomach upset<br>Urticaria<br>Vomiting | NM<br>41 ASR                                                             | Mild              | Pharmaceutical sciences/naturopathy | None reported | Grant from New Chapter (manufacturer of cinnamon natural health product) and Sick Kids Foundation |
| Dugoua (2008) <sup>22</sup>     | Canada  | AEs                                  | Blue cohosh ( <i>Caulophyllum thalictroides</i> ) | Pregnancy and lactation (not a clinical condition <i>per se</i> )                                           | <100 (~10)        | CRs<br>In-vitro studies                                           | No                    | 2                | Mild to moderate AEs                                                | Acute MI<br>Perinatal stroke<br>Profound CHF<br>Severe multiborgan hypoxic injury<br>Abortifacient properties                                                  | Several weeks<br>10 endangered fetus                                     | Severe            | Pharmaceutical sciences/naturopathy | NM            | NM                                                                                                |
| Giles (2005) <sup>25</sup>      | USA     | AEs<br>Drug interactions<br>Toxicity | Butterbur ( <i>Petasites hybridus</i> )           | Allergic rhinitis<br>Asthma<br>Migraine (prevention)<br>Skin diseases                                       | <100 (~10)        | Open study<br>RCT<br>Review                                       | No                    | 0                | Only mild AEs                                                       | Constipation<br>Diarrhoea<br>Difficulty breathing<br>Discoloration of stool<br>Dysphagia<br>GI upset<br>Pruritis<br>Severe nausea<br>Vomiting                  | NM                                                                       | Mild              | PharmD                              | NM            | NM                                                                                                |
| Hackman (2006) <sup>30</sup>    | USA     | AEs<br>Drug interactions<br>Toxicity | Agave ( <i>Agave americana</i> )                  | NM                                                                                                          | <10 (~20)         | CRs                                                               | No                    | 2                | Only mild AEs                                                       | Contact dermatitis<br>Leukocytoclastic vasculitis                                                                                                              | 7–10 days<br>15 contact dermatitis                                       | Mild              | BS                                  | NM            | NM                                                                                                |
| Hammerness (2003) <sup>45</sup> | USA     | AEs<br>Drug interactions<br>Toxicity | St John's wort ( <i>Hypericum perforatum</i> )    | Mild to moderate depression                                                                                 | >100 (~8 minimum) | Case series<br>CCTs<br>CRs<br>CS<br>MIAs<br>RCTs<br>Review<br>SRS | No                    | 4                | Only mild AEs for safety and serious concerns for drug interactions | Anxiety<br>Dizziness<br>Dry mouth in 1–3% of patients<br>Fatigue<br>GI symptoms<br>Headache<br>Sedation<br>Skin reaction                                       | 4–6 weeks<br>27 ASR                                                      | Mild              | MD                                  | NM            | Privately funded                                                                                  |

Continues

Table S1. Continued

| Author (year)                | Country | Type of safety concerns              | Herbal medicine evaluated                | Primary data                                                       |                 |                                          | AEs                     |               |                      |                                                                                                                                                                                   | First authors' degree/background | Conflict of interest                                 | Source of funding         |                     |               |                                                                                         |
|------------------------------|---------|--------------------------------------|------------------------------------------|--------------------------------------------------------------------|-----------------|------------------------------------------|-------------------------|---------------|----------------------|-----------------------------------------------------------------------------------------------------------------------------------------------------------------------------------|----------------------------------|------------------------------------------------------|---------------------------|---------------------|---------------|-----------------------------------------------------------------------------------------|
|                              |         |                                      |                                          | Clinical conditions                                                | Range (N* (n†)) | Type                                     | Meta-analysis?†         | Quality of SR | Overall judgment     | Type                                                                                                                                                                              |                                  |                                                      |                           | Duration            | Frequency     | Severity                                                                                |
| Huntley (2005) <sup>24</sup> | UK      | AEs                                  | <i>Echinacea spp.</i>                    | Healthy volunteers<br>Various clinical and non-clinical conditions | <100 (~1090)    | From clinical trials to CRs and SRs      | No                      | 4             | Only mild AEs        | GI upset and rash (most frequent to allergic reaction (rarely))                                                                                                                   | 24–48 hours                      | 182 GI upset 143 ASR                                 | Mild                      | PhD                 | None reported | Boots the Chemists                                                                      |
| Jacobs (2002) <sup>25</sup>  | USA     | AEs                                  | Milk thistle ( <i>Silybum marianum</i> ) | Liver disease                                                      | <100 (~18)      | Cohort studies<br>CRs RCTs               | Yes (for effectiveness) | 5             | Only mild AEs        | Dermatological symptom<br>Gastroenteritis (multipreparation of milk thistle) GI symptom<br>Headache                                                                               | NM                               | 25 GI upset                                          | Mild                      | MD MPH              | NM            | Contract 290-97-0012 to Agency for Healthcare Research and Quality, Rockville, Maryland |
| Johnson (2007) <sup>44</sup> | USA     | AEs<br>Safety                        | <i>Capsicum spp.</i>                     | Atopic eczema<br>Cancer<br>Diabetes<br>Pain                        | <100 (~215)     | In-vivo studies<br>RCTs                  | No                      | -5            | Only mild AEs        | ASR<br>Burning sensation<br>Cough/sneezing                                                                                                                                        | 30 minutes–24 hours              | 157 burning sensation<br>16 coughing/sneezing        | Mild to moderate          | Cosmetics           | NM            | NM                                                                                      |
| Keifer (2007) <sup>51</sup>  | USA     | AEs<br>Drug interactions<br>Toxicity | Peppermint ( <i>Mentha piperita</i> )    | Various clinical conditions                                        | <100 (IE)       | CCT CRs CS<br>In-vivo studies<br>MA RCTs | No                      | 2             | Mild to moderate AEs | Acute lung injury<br>Acute renal failure<br>Bradycardia<br>Contact dermatitis<br>Heartburn<br>Hypersensitivity<br>Muscle tremor<br>Perianal burning<br>Tachycardia                | NM                               | 44 tachycardia<br>4 hyper-sensitivity<br>2 skin rash | Mild to severe            | MD                  | NM            | NM                                                                                      |
| Kienle (2011) <sup>46</sup>  | Germany | AEs<br>Safety                        | Mistletoe ( <i>Viscum album</i> )        | Cancer                                                             | <100 (~13)      | Phase I trials<br>RCTs                   | No                      | 5             | Mild to moderate AEs | Anxiety<br>Cutaneous rash<br>Dry eyes<br>Fatigue<br>Fever<br>GI upset<br>Headache<br>Hypokalaemia<br>Lassitude<br>Liver toxicity<br>Mild infection<br>Pain<br>Rise in temperature | NM                               | 5 liver toxicity 2 angioedema/urticaria              | Mild to severe            | Medical methodology | Declared      | Weleda, Wala, Helixor and Novipharm                                                     |
| Liu (2001) <sup>26</sup>     | Denmark | AEs<br>Safety                        | <i>Genus phyllanthus</i>                 | HBV                                                                | <100 (~46)      | RCTs                                     | Yes                     | 4             | Only mild AEs        | Light nausea<br>Decreased appetite<br>Stomach ache (n=4)                                                                                                                          | 20–40 days                       | 46 GI upset                                          | Mild                      | MD                  | NM            | Danish Medical Research Council Grant on Getting Research into Practice (GRIP), Denmark |
| Nelsen (2002) <sup>27</sup>  | USA     | AEs<br>Drug interaction<br>Toxicity  | Red clover ( <i>Trifolium pratense</i> ) | Asthma<br>Cancer<br>Gout<br>Menopausal symptoms<br>Pertussis       | <100 (IE)       | CS<br>RCTs                               | No                      | 1             | Mild to moderate AEs | NM                                                                                                                                                                                | NM                               | NM                                                   | Mild to moderate          | PharmD              | NM            | NM                                                                                      |
| Sarma (2008) <sup>38</sup>   | USA     | Safety<br>Toxicity                   | Green tea ( <i>Camellia sinensis</i> )   | Cancer prevention                                                  | >100 (~162)     | CS<br>SRS                                | No                      | 3             | Mild to moderate AEs | Liver damage<br>Pain                                                                                                                                                              | 9 days–5 months                  | 34 liver damage                                      | Mild, moderate and severe | PhD                 | None declared | US Pharmacopeia                                                                         |

Continues

Table S1. Continued

| Author (year) Country                | Type of safety concerns                               | Herbal medicine evaluated                                  | Primary data                                                                                              |                 |                    | AEs                              |                  |                        |                                                                                                                                                                                                                                                                                                                                                                                                                             |            | First authors' degree/background                             | Conflict of interest | Source of funding |                    |                                                         |
|--------------------------------------|-------------------------------------------------------|------------------------------------------------------------|-----------------------------------------------------------------------------------------------------------|-----------------|--------------------|----------------------------------|------------------|------------------------|-----------------------------------------------------------------------------------------------------------------------------------------------------------------------------------------------------------------------------------------------------------------------------------------------------------------------------------------------------------------------------------------------------------------------------|------------|--------------------------------------------------------------|----------------------|-------------------|--------------------|---------------------------------------------------------|
|                                      |                                                       |                                                            | Clinical conditions                                                                                       | Range (N* (n†)) | Type               | Meta-analysis <sup>2</sup> of SR | Overall judgment | Type                   | Duration                                                                                                                                                                                                                                                                                                                                                                                                                    | Frequency  |                                                              |                      |                   | Severity           |                                                         |
| Sawovic (2005) <sup>29</sup><br>UK   | Blood coagulation                                     | <i>Ginigo biloba</i>                                       | Patients taking concomitant anticoagulant medication<br>Healthy volunteers<br>Various clinical conditions | <10 (~56)       | Mostly RCTs        | No                               | 5                | Only mild AEs          | Platelet aggregation<br>Other coagulation abnormalities                                                                                                                                                                                                                                                                                                                                                                     | NM         | 10 platelet aggregation disorder<br>10 GI upset              | Mild                 | PhD               | Potential declared | Dr Willmar Schwabe Pharmaceuticals                      |
| Sweeney (2005) <sup>30</sup><br>USA  | AEs<br>Contamination<br>Drug interactions<br>Toxicity | Dandelion<br>( <i>Taraxacum officinale</i> )               | Hepatitis B<br>Pain                                                                                       | <10 (~7)        | CS                 | No                               | 0                | Mild to moderate AEs   | Fever<br>Intestinal blockage<br>Liver damage<br>Loss of appetite<br>Platelet aggregation<br>Stomach upset<br>Vomiting                                                                                                                                                                                                                                                                                                       | NM         | 5 ASR                                                        | Mild to moderate     | PharmD            | NM                 | NM                                                      |
| Taibi (2007) <sup>31</sup><br>USA    | AEs                                                   | Valerian<br>( <i>Valeriana officinalis</i> )               | Insomnia                                                                                                  | <100 (~67)      | RCTs               | No                               | 5                | Only mild AEs          | Diarrhoea<br>Dizziness<br>Drowsiness<br>Headache<br>Nausea                                                                                                                                                                                                                                                                                                                                                                  | NM         | 8 GI upset<br>8 hangover<br>3 headache                       | Mild                 | Nursing           | NM                 | NIH grants: R21-AT-002108, P30-NR04001, and T32-NR07039 |
| Tiffany (2002) <sup>32</sup><br>USA  | AEs<br>Drug interaction<br>Toxicity                   | Horse chestnut seed extract<br>( <i>Hippocastanaceae</i> ) | Chronic venous insufficiency                                                                              | <100 (IE)       | OS<br>RCTs<br>SR   | No                               | 1                | Only mild AEs          | Dizziness<br>GI upset<br>Headache<br>Muscle spasm<br>Nausea<br>Nephrotoxicity<br>Pruiritis                                                                                                                                                                                                                                                                                                                                  | NM         | 2 headache/<br>dizziness                                     | Mild                 | MD                | NM                 | Privately funded                                        |
| Ulbricht (2003) <sup>33</sup><br>USA | AEs<br>Drug interaction<br>Toxicity                   | Chaparral<br>( <i>Larrea tridentate</i> )                  | Cancer                                                                                                    | <100 (~69)      | CR                 | No                               | 2                | Moderate to severe AEs | Cirrhosis<br>Hepatitis<br>Liver failure<br>Renal cyst<br>Renal cell carcinoma                                                                                                                                                                                                                                                                                                                                               | 1-17 weeks | 59 ASR<br>8 liver damage<br>2 kidney failure<br>2 fever      | Severe               | PharmD            | NM                 | Privately funded                                        |
| Ulbricht (2004) <sup>34</sup><br>USA | AEs<br>Drug interaction<br>Toxicity                   | Belladonna<br>( <i>Herbae pulvis standardisatus</i> )      | Headache<br>IBS<br>Menopausal symptoms<br>Otitis media<br>PMS                                             | <100 (~20)      | NRCT<br>OS<br>RCTs | No                               | -5               | Moderate to severe AEs | Acute psychosis<br>Agitation<br>Blurred vision<br>Coma<br>Confusion<br>Constipation<br>Convulsions<br>Dizziness<br>Drowsiness<br>Dry mouth<br>Excitement<br>Flushing<br>Hallucinations<br>Headache<br>Hyperreflexia<br>Lightheadedness<br>Mydriasis<br>Photophobia<br>Pupillary dilation<br>Respiratory arrest<br>Sedation<br>Skin problem<br>Slurred speech<br>Tachycardia<br>Unsteadiness<br>Urinary retention<br>Vertigo | NM         | 8 neurological AE<br>7 psychiatric AE<br>6 cardiovascular AE | Moderate to severe   | PharmD            | NM                 | NM                                                      |

Continues

Table S1. Continued

| Author (year) Country             | Type of safety concerns              | Herbal medicine evaluated                      | Primary data    |                                                              |                                                                             | Meta-analysis: <sup>†</sup> Quality of SR | AEs                    |                                                                                                                                                                                                        |                      |                                                 | First authors' degree/ background | Conflict of interest | Source of funding |          |
|-----------------------------------|--------------------------------------|------------------------------------------------|-----------------|--------------------------------------------------------------|-----------------------------------------------------------------------------|-------------------------------------------|------------------------|--------------------------------------------------------------------------------------------------------------------------------------------------------------------------------------------------------|----------------------|-------------------------------------------------|-----------------------------------|----------------------|-------------------|----------|
|                                   |                                      |                                                | Range (N* (n†)) | Type                                                         | Clinical conditions                                                         |                                           | Overall judgment       | Type                                                                                                                                                                                                   | Duration             | Frequency                                       |                                   |                      |                   | Severity |
| Ulbricht (2005) <sup>35</sup> USA | AEs<br>Drug interactions<br>Toxicity | Lemon balm ( <i>Melissa officinalis</i> )      | <100 (~17)      | CS<br>RCT                                                    | Anxiety<br>Cognitive performance<br>Dyspepsia<br>Herpes simplex<br>Insomnia | No<br>0                                   | Only mild AEs          | Diarrhoea<br>EEG changes<br>Headache<br>Nausea<br>Reduced alertness<br>Sleep disturbances<br>Tiredness                                                                                                 | NM                   | 28 tiredness/<br>sleep disturbance              | Mild                              | PharmD               | NM                | NM       |
| Ulbricht (2005) <sup>36</sup> USA | AEs<br>Drug interactions<br>Toxicity | Guggul ( <i>Commifora mukul</i> )              | <100 (~36)      | CS<br>RCTs                                                   | Hyperlipidaemia                                                             | No<br>1                                   | Mild to moderate AEs   | Allergy<br>GI upset<br>Headache<br>Hypersensitive skin<br>Inhibition of platelet aggregation<br>and increased fibrinolysis<br>Renal failure<br>Rhabdomyolysis                                          | 48 hours–<br>2 weeks | 22 headache<br>15 GI upset<br>6 ASR             | Mild to moderate                  | PharmD               | NM                | NM       |
| Ulbricht (2005) <sup>37</sup> USA | AEs<br>Drug interactions<br>Toxicity | Kava ( <i>Piper methysticum</i> )              | <100 (~303)     | CRs<br>RCTs                                                  | Anxiety disorders                                                           | No<br>3                                   | Moderate to severe AEs | Allergy<br>Apathy<br>Death<br>GI upset<br>Liver failure<br>Shortness of breath<br>Tachycardia                                                                                                          | NM                   | 69 GI upset<br>31 liver damage                  | Moderate to severe                | PharmD               | NM                | NM       |
| Ulbricht (2007) <sup>37</sup> USA | AEs<br>Drug interactions<br>Toxicity | Fenugreek ( <i>Trigonella foenum-graecum</i> ) | <10 (~15)       | Case studies<br>CS<br>RCTs<br>SRs                            | Diabetes                                                                    | No<br>2                                   | Only mild AEs          | Allergic reaction<br>Bronchospasm<br>Diarrhoea and flatulence<br>Dizziness<br>Numbness of head                                                                                                         | NM                   | 8 acute and chronic hypoglycaemia<br>4 GI upset | Mild                              | PharmD               | NM                | NM       |
| Ulbricht (2007) <sup>38</sup> USA | AEs<br>Drug interactions<br>Toxicity | Banaba ( <i>Lagerstroemia speciosa</i> )       | <10 (IE)        | RCT                                                          | Diabetes                                                                    | No<br>1                                   | Only mild AEs          | None reported                                                                                                                                                                                          | NM                   | NM                                              | Mild                              | PharmD               | NM                | NM       |
| Ulbricht (2007) <sup>32</sup> USA | AEs<br>Drug interactions<br>Toxicity | <i>Aloe vera</i>                               | <100 (IE)       | CRs<br>RCTs<br>SRs                                           | Various clinical conditions                                                 | No<br>2                                   | Mild to moderate AEs   | Acute hepatitis<br>Abdominal cramping and diarrhoea<br>Death<br>Delayed wound healing<br>Erythema<br>Excess bleeding<br>Photodermatitis<br>Potassium depletion<br>Skin dryness<br>Soreness<br>Stinging | NM                   | 22 skin dryness                                 | Mild to moderate                  | PharmD               | NM                | NM       |
| Ulbricht (2008) <sup>33</sup> USA | AEs<br>Drug interactions<br>Toxicity | Blessed thistle ( <i>Cnicus benedictus</i> )   | <10 (0)         | Anecdotal data<br>Animal studies<br>Post-market surveillance | Dyspepsia<br>Viral infection                                                | No<br>2                                   | Only mild AEs          | Allergy/<br>hypersensitivity<br>Stomach irritation<br>Vomiting                                                                                                                                         | NM                   | NM                                              | Mild                              | PharmD               | NM                | NM       |

Continues

Table S1. Continued

| Author (year)                 | Country | Type of safety concerns        | Herbal medicine evaluated                                   | Clinical conditions         | Primary data    |                                                | Meta-analysis?† of SR | Quality of SR | Overall judgment     | AEs                                                                                                                                                         |          |                                                                 |                  | First authors' degree/ background | Conflict of interest | Source of funding |
|-------------------------------|---------|--------------------------------|-------------------------------------------------------------|-----------------------------|-----------------|------------------------------------------------|-----------------------|---------------|----------------------|-------------------------------------------------------------------------------------------------------------------------------------------------------------|----------|-----------------------------------------------------------------|------------------|-----------------------------------|----------------------|-------------------|
|                               |         |                                |                                                             |                             | Range (N* (n†)) | Type                                           |                       |               |                      | Type                                                                                                                                                        | Duration | Frequency                                                       | Severity         |                                   |                      |                   |
| Ulbricht (2009) <sup>39</sup> | USA     | AEs Drug interactions Toxicity | Chia ( <i>Salvia hispanica</i> )                            | CVD                         | <10 (0)         | RCTs                                           | No                    | 0             | Only mild AEs        | GI upset                                                                                                                                                    | NM       | NM                                                              | Mild             | PharmD                            | NM                   | NM                |
| Ulbricht (2009) <sup>54</sup> | USA     | AEs Drug interactions Toxicity | Green-lipped mussel ( <i>Perna canaliculus</i> )            | Asthma OA RA                | <100 (IE)       | CRs Post-market surveillance RCT               | No                    | 2             | Mild to moderate AEs | Fluid retention GI upset Gout Heart failure Hepatitis Liver failure Lung dysfunction Skin rash                                                              | NM       | 3 toxic hepatitis 2 abnormal liver function                     | Mild to severe   | PharmD                            | NM                   | NM                |
| Ulbricht (2009) <sup>55</sup> | USA     | AEs Drug interactions Toxicity | Bilberry ( <i>Vaccinium myrtillus</i> )                     | Various clinical conditions | <10 (IE)        | Comparative study Post-market surveillance     | No                    | 2             | Only mild AEs        | GI discomfort Heartburn Nausea                                                                                                                              | NM       | 22 GI discomfort                                                | Mild             | PharmD                            | NM                   | NM                |
| Ulbricht (2010) <sup>56</sup> | USA     | AEs Drug interactions Toxicity | Umckaloabo ( <i>Pelegonium sidaoides</i> )                  | Acne Bronchitis Common cold | <10 (~60)       | CRs Post-market surveillance RCTs              | No                    | 2             | Mild to moderate AEs | Angioedema Bronchospasm Circulatory failure Conjunctivitis Diarrhoea Dyspnoea GI irritation Hepatotoxicity Increased risk of bleeding Skin rash Tachycardia | NM       | 34 skin rash with itching 17 angioedema or systemic involvement | Mild to severe   | PharmD                            | NM                   | NM                |
| Ulbricht (2010) <sup>40</sup> | USA     | AEs Drug interactions Toxicity | Stevia ( <i>Stevia rebaudiana</i> )                         | Hyperglycaemia Hypertension | <10 (~8)        | CCTs RCTs                                      | No                    | 0             | Mild to moderate AEs | Asthenia Abdominal fullness Dizziness Myalgia and muscle weakness Nausea                                                                                    | 1 week   | 4 GI upset                                                      | Mild to moderate | PharmD                            | NM                   | NM                |
| Ulbricht (2010) <sup>57</sup> | USA     | AEs Drug interactions Toxicity | Spearmint ( <i>Mentha spicata</i> , <i>Mentha viridis</i> ) | Various clinical conditions | <100 (IE)       | NRCTs RCTs                                     | No                    | 2             | Only mild AEs        | Contact cheilitis Contact dermatitis Erythema and blistering Heartburn Pain                                                                                 | NM       | 6 cheilitis 3 dermatitis                                        | Mild             | PharmD                            | NM                   | NM                |
| Ulbricht (2010) <sup>58</sup> | USA     | AEs Drug interactions Toxicity | Rosemary ( <i>Rosmarinus officinalis</i> )                  | Various clinical conditions | <100 (IE)       | CRs Post-market surveillance RCTs              | No                    | 2             | Only mild AEs        | Allergic reactions Contact dermatitis Perforation of gastric antrum Seizures or epilepsy                                                                    | NM       | 4 contact dermatitis                                            | Mild             | PharmD                            | NM                   | NM                |
| Ulbricht (2011) <sup>59</sup> | USA     | AEs Drug interactions Toxicity | Saffron ( <i>Crocus sativus</i> )                           | Various clinical conditions | <10 (IE)        | Equivalence trials Market surveillance RCTs SR | No                    | 2             | Only mild AEs        | Allergic reaction Anaphylactic reaction Contact dermatitis                                                                                                  | NM       | 4 allergic reaction                                             | Mild             | PharmD                            | NM                   | NM                |

Continues

Table S1. Continued

| Author (year)                 | Country                  | Type of safety concerns        | Herbal medicine evaluated                  | Primary data                                               |                 |                                                                                | AEs                              |               |                      |                                                                                                                                                                                                                                                                                                                              |             | First authors' degree/background            | Conflict of interest | Source of funding       |                                                        |                                         |
|-------------------------------|--------------------------|--------------------------------|--------------------------------------------|------------------------------------------------------------|-----------------|--------------------------------------------------------------------------------|----------------------------------|---------------|----------------------|------------------------------------------------------------------------------------------------------------------------------------------------------------------------------------------------------------------------------------------------------------------------------------------------------------------------------|-------------|---------------------------------------------|----------------------|-------------------------|--------------------------------------------------------|-----------------------------------------|
|                               |                          |                                |                                            | Clinical conditions                                        | Range (N* (n†)) | Type                                                                           | Meta-analysis <sup>‡</sup> of SR | Quality of SR | Overall judgment     | Type                                                                                                                                                                                                                                                                                                                         | Duration    |                                             |                      |                         | Frequency                                              | Severity                                |
| Ulbricht (2011) <sup>60</sup> | USA                      | AEs Drug interactions Toxicity | Gymnema ( <i>Gymnema sylvestre</i> R. Br.) | Constipation<br>Diabetes<br>Hyperlipidaemia<br>Weight loss | <10 (IE)        | CS<br>NRCT<br>RCT                                                              | No                               | 2             | Only mild AEs        | 1 hypoglycaemic episode                                                                                                                                                                                                                                                                                                      | NM          | 1 hypoglycaemia                             | Mild                 | PharmD                  | NM                                                     | NM                                      |
| Ulbricht (2011) <sup>61</sup> | USA                      | AEs Drug interactions Toxicity | Senna ( <i>Cassia senna</i> )              |                                                            | <100 (IE)       | Case-control studies<br>CCTs<br>CRs<br>Post-market surveillance<br>RCTs<br>SRs | No                               | 2             | Mild to severe AEs   | Abdominal pain<br>Bleeding<br>Bloating<br>Cachexia<br>Cancer<br>Chronic liver damage<br>Colon perforation<br>Cramping<br>Diarrhoea<br>Finger clubbing<br>Flatulence<br>Hepatitis<br>Hypertrophic osteoarthropathy<br>Incontinence<br>Nausea<br>Nephrocalcinosis<br>Portal vein thrombosis<br>Skin rash<br>Tetany<br>Vomiting | NM          | 7 severe GI upset<br>6 chronic liver damage | Mild to severe       | PharmD                  | NM                                                     | NM                                      |
| Vermaak (2011) <sup>41</sup>  | Republic of South Africa | AEs                            | Masson ( <i>Hoodia gordonii</i> )          | Obesity                                                    | <10 (~2)        | Case studies<br>In-vivo studies                                                | No                               | -5            | Mild to moderate AEs | Acute hepatitis (unlike causality)                                                                                                                                                                                                                                                                                           | NM          | 2 liver damage                              | Severe               | Pharmaceutical Sciences | NM                                                     | NM                                      |
| West (2006) <sup>42</sup>     | USA                      | AEs Safety Toxicity            |                                            | Advanced cancer<br>Healthy individuals                     | <100 (~6)       | Case studies<br>CR<br>RCTs                                                     | No                               | -5            | Only mild AEs        | Acute hepatitis (causality questioned)<br>Hyperkalaemia<br>Hepatotoxicity                                                                                                                                                                                                                                                    | 1–11 months | 4 liver damage                              | Mild to severe       |                         | Manufacturer of Noni Juice- <i>Tahitian Noni Int'l</i> |                                         |
| Wu (2003) <sup>43</sup>       | USA                      | AEs Safety Toxicity            | Tumeric ( <i>Curcuma longa</i> )           | AIDS<br>Chronic uveitis<br>Post-surgery<br>RA              | <10 (~3)        | CCT<br>CS<br>In-vivo studies<br>RCTs                                           | No                               | -1            | Only mild AEs        | Gastric irritation<br>Mild transient giddiness                                                                                                                                                                                                                                                                               | NM          | 2 GI upset                                  | Mild                 | Stomatology             | NM                                                     | NIH grants K-16 DE00386 and T32 DE07204 |

AE, adverse effect; AIDS, acquired immune deficiency syndrome; ASR, adverse skin reaction; BPH, benign prostatic hyperplasia; CAM, complementary and alternative medicine; CCT, controlled clinical trial; CHF, congestive heart failure; CR, case report; CS, case series; COJ, conflict of interest; CVD, cardiovascular disease; EEG, electroencephalogram; GI, gastrointestinal; HBV, hepatitis B virus; HF5, herbal food supplements; HIV, human immunodeficiency virus; HM, herbal medicine; IBS, irritable bowel syndrome; IE, ingestible; MA, meta-analysis; MD, Doctor of Medicine; MI, myocardial infarction; MPH, Master of Public Health; NIH, National Institutes of Health; NM, not mentioned; NRCT, non-randomised controlled trial; NS, not specified; OA, osteoarthritis; OS, observational study; PharmD, Doctor of Pharmacy; PhD, Doctor of Philosophy; PMS, premenstrual syndrome; QRCT, quasi randomised controlled trial; RA, rheumatoid arthritis; RCT, randomised controlled trial; RRC, retrospective review of cases; RTI, respiratory tract infection; SR, systematic review; SRS, spontaneous reporting scheme; TGV, thunder god vine; UCT, uncontrolled trial.

\*Range of primary data.  
†Total number of patients experiencing AEs, if estimable.  
‡Scoring: each question is scored as 1, 0 or -1; a score of ≤0 means the review has major flaws, 1–2 means minor flaws and 3–5 means minimal or no flaws; 1 means that: (a) the review states the databases used, the date of the most recent searches and includes some mention of search terms; (b) the review searches at least two databases and looks at other sources; (c) the review states in the overview the criteria used for deciding which studies to include; (d) the review reports how many studies were identified by searches, the numbers of studies excluded and the appropriate reasons for excluding them; (e) the conclusions made by the author(s) are supported by the data and/or analysis reported in the review; 0 means that the above-mentioned criteria were partially fulfilled; and -1 means that none of the above criteria were fulfilled. This is an operationalisation of the Oxman criteria,<sup>11</sup> adapted from Ernst et al (2011).<sup>10</sup>

Table S2. Aims and conclusions from systematic reviews.

| Author (year) herb                                                  | Aim/quote (where appropriate)                                                                                                                                                                                                                                          | Conclusion/quote                                                                                                                                                                                                                                                                                                                                                                                                                                                                                           | Direction of conclusion |
|---------------------------------------------------------------------|------------------------------------------------------------------------------------------------------------------------------------------------------------------------------------------------------------------------------------------------------------------------|------------------------------------------------------------------------------------------------------------------------------------------------------------------------------------------------------------------------------------------------------------------------------------------------------------------------------------------------------------------------------------------------------------------------------------------------------------------------------------------------------------|-------------------------|
| Agbabiaka (2009) <sup>12</sup><br><i>Serenoa repens</i>             | To assess 'all available human safety data of <i>Serenoa repens</i> monopreparations'                                                                                                                                                                                  | 'Currently available data suggest that <i>S. repens</i> is well tolerated by most users and is not associated with serious adverse events. The majority of adverse events are mild, infrequent and reversible, and include abdominal pain, diarrhoea, nausea and fatigue, headache, decreased libido and rhinitis. We found no evidence for drug interactions with <i>S. repens</i> . However, higher quality reporting of adverse events is essential if safety assessments are to be improved in future' | (-/+)                   |
| Basch (2003) <sup>49</sup><br><i>Medicago sativa</i>                | To undertake a clinical decision support tool for the safety of alfalfa                                                                                                                                                                                                | '...there is currently insufficient information from clinical trials to adequately evaluate the safety or efficacy of alfalfa for any indication'                                                                                                                                                                                                                                                                                                                                                          | (-/+)                   |
| Basch (2004) <sup>13</sup><br><i>Thymus vulgaris</i>                | 'An evidence-based systematic review including scientific evidence, expert opinion, folkloric precedent, history, pharmacology, kinetics/dynamics, interactions, adverse effects, toxicology, and dosing [of thyme]'                                                   | '...caution is warranted with the use of thyme oil, which should not be taken orally and should be diluted for topical administration due to potential toxic effects'                                                                                                                                                                                                                                                                                                                                      | (+)                     |
| Basch (2004) <sup>14</sup><br><i>Lavandula angustifolia</i> Miller  | 'An evidence-based systematic review including scientific evidence, expert opinion, folkloric precedent, history, pharmacology, kinetics/dynamics, interactions, adverse effects, toxicology, and dosing [of lavender]'                                                | 'In recommended doses, lavender is generally considered to be well-tolerated, with minimal adverse effects'                                                                                                                                                                                                                                                                                                                                                                                                | (+)                     |
| Basch (2004) <sup>15</sup><br><i>Boswellia serrata</i>              | 'An evidence-based systematic review including written and statistical analysis of scientific literature, expert opinion, folkloric precedent, history, pharmacology, kinetics/dynamics, interactions, adverse effects, toxicology, and dosing [of <i>Boswellia</i> ]' | 'General: <i>Boswellia</i> is generally believed to be safe when used as directed, although safety and toxicity have not been systematically studied in humans'                                                                                                                                                                                                                                                                                                                                            | (+)                     |
| Basch (2006) <sup>16</sup><br><i>Calendula officinalis</i>          | 'An evidence-based systematic review including written and statistical analysis of scientific literature, expert opinion, folkloric precedent, history, pharmacology, kinetics/dynamics, interactions, adverse effects, toxicology and dosing [of marigold]'           | '...there is insufficient evidence to support the safety of these ingredients in cosmetic formulations'                                                                                                                                                                                                                                                                                                                                                                                                    | (+)                     |
| Borelli (2008) <sup>48</sup> <i>Cimicifuga racemosa</i>             | 'The aim of this systematic review was to evaluate the clinical evidence for or against the safety of black cohosh'                                                                                                                                                    | 'In conclusion, black cohosh has been associated with serious safety concerns that urgently require further investigation'                                                                                                                                                                                                                                                                                                                                                                                 | (-/+)                   |
| Brendler (2006) <sup>17</sup><br><i>Harpagophytum procumbens</i> DC | 'An evidence-based systematic review including written and statistical analysis of scientific literature, expert opinion, folkloric precedent, history, pharmacology, kinetics/dynamics, interaction, adverse effects, toxicology, and dosing [of devil's claw]'       | 'There is a growing body of scientific evidence suggesting that devil's claw is safe and beneficial in the short-term management of pain related to degenerative joint disease or osteoarthritis...'                                                                                                                                                                                                                                                                                                       | (+)                     |
| Coon (2002) <sup>18</sup><br><i>Panax ginseng</i>                   | '...to document and evaluate all the available safety data on <i>P. ginseng</i> root extracts'                                                                                                                                                                         | 'Collectively, these data suggest that <i>P. ginseng</i> monopreparations are rarely associated with adverse events or drug interactions. The ones that are documented are usually mild and transient. Combined preparations are more often associated with such events but causal attribution is usually not possible'                                                                                                                                                                                    | (+)                     |
| Daniele (2005) <sup>19</sup><br><i>Vitex agnus-castus</i>           | '...to evaluate all the available human safety data of VAC monopreparations'                                                                                                                                                                                           | 'Although further rigorous studies are needed to assess the safety of VAC, the data available seem to indicate that VAC is a safe herbal medicine'                                                                                                                                                                                                                                                                                                                                                         | (+)                     |

Continues



Table S2. Continued.

| Author (year) herb                                                                                     | Aim/quote (where appropriate)                                                                                                                                                                                                                                                             | Conclusion/quote                                                                                                                                                                                                                                                                                                                                                                                                                                                                                                     | Direction of conclusion |
|--------------------------------------------------------------------------------------------------------|-------------------------------------------------------------------------------------------------------------------------------------------------------------------------------------------------------------------------------------------------------------------------------------------|----------------------------------------------------------------------------------------------------------------------------------------------------------------------------------------------------------------------------------------------------------------------------------------------------------------------------------------------------------------------------------------------------------------------------------------------------------------------------------------------------------------------|-------------------------|
| Daniele (2006) <sup>20</sup><br><i>Crataegus</i> spp.                                                  | 'The aim of this article is to assess the safety data of all available human studies on hawthorn monopreparations'                                                                                                                                                                        | 'In conclusion, all data reviewed in this article seem to indicate that hawthorn is well tolerated even if some severe adverse events were reported; this suggests that further studies are needed to better assess the safety of hawthorn-containing preparations. Moreover, the unsupervised use of this drug can be associated with problems, especially if given with concomitant medications'                                                                                                                   | (+)                     |
| Dugoua (2007) <sup>21</sup><br><i>Cinnamomum verum</i> , <i>C. zeylanicum</i> and <i>C. aromaticum</i> | '...to systematically review the scientific literature for preclinical and clinical evidence of safety, efficacy, and pharmacological activity of common and cassia cinnamon'                                                                                                             | '...common and cassia cinnamon appear to be generally well tolerated'                                                                                                                                                                                                                                                                                                                                                                                                                                                | (+)                     |
| Dugoua (2008) <sup>22</sup><br><i>Caulophyllum thalictroides</i>                                       | 'To systematically review the literature for evidence on the use, safety and pharmacology of blue cohosh, focusing on issues pertaining to pregnancy and lactation'                                                                                                                       | 'There is an urgent need to conduct a retrospective or prospective cohort study of midwives using blue cohosh to determine its safety at the time of delivery, as any scientific evidence of safety or harm is more likely to be in the files of the midwifery practices than in governmental databases or hospitals'                                                                                                                                                                                                | (-/+)                   |
| Giles (2005) <sup>23</sup><br><i>Petasites hybridus</i>                                                | 'An evidence-based systematic review including written and statistical analysis of scientific literature, expert opinion, folkloric precedent, history, pharmacology, kinetics/dynamics, interactions, adverse effects, toxicology, and dosing [of butterbur]'                            | 'The plant's pyrrolizidine alkaloids are thought to be hepatotoxic, carcinogenic, mutagenic, and nephrotoxic. However, commercially available extracts have the pyrrolizidine alkaloids removed'                                                                                                                                                                                                                                                                                                                     | (+)                     |
| Hackman (2006) <sup>50</sup><br><i>Agave Americana</i>                                                 | 'An evidence-based systematic review including written and statistical analysis of scientific literature, expert opinion, folkloric precedent, history, pharmacology, kinetics/dynamics, interactions, adverse effects, toxicology, and dosing [of agave]'                                | 'Avoid in patients with known allergies to plants in the <i>Agavaceae</i> family. Use cautiously in patients trying to conceive due to possible contraceptive effects'                                                                                                                                                                                                                                                                                                                                               | (+)                     |
| Hammerness (2003) <sup>45</sup><br><i>Hypericum perforatum</i>                                         | 'This evidence-based presentation of the literature includes a brief description of pharmacodynamics and clinical applications, followed by a systematic review of adverse effects, toxicity, and drug interactions'                                                                      | 'While it is generally well tolerated, there is accumulating evidence of clinically significant interactions of St. John's wort and drugs, particularly when used with medications metabolized by the cytochrome P-450 system'                                                                                                                                                                                                                                                                                       | (+)                     |
| Huntley (2005) <sup>24</sup><br><i>Echinacea</i> spp.                                                  | '...to systematically review the information on the safety of echinacea from clinical studies, case reports, surveillance schemes and other investigations'                                                                                                                               | 'Short-term use of echinacea is associated with a relatively good safety profile, with a slight risk of transient, reversible, adverse events. The association of echinacea with allergic reactions is supported by the present evaluation. While these reactions are likely to be rare, patients with allergy or asthma should carefully consider their use of echinacea. The use of echinacea products during pregnancy and lactation would appear to be ill-advised in light of the paucity of data in this area' | (+)                     |
| Jacobs (2002) <sup>25</sup><br><i>Silybum marianum</i>                                                 | '...to determine the efficacy and safety of this herb [milk thistle] for the treatment of liver disease'                                                                                                                                                                                  | 'Treatment with milk thistle appears to be safe and well tolerated'                                                                                                                                                                                                                                                                                                                                                                                                                                                  | (+)                     |
| Johnson (2007) <sup>44</sup><br><i>Capsicum</i> spp.                                                   | To assess safety of <i>Capsicum annuum</i> extract, <i>Capsicum annuum</i> fruit extract, <i>Capsicum annuum</i> resin, <i>Capsicum annuum</i> fruit powder, <i>Capsicum frutescens</i> fruit, <i>Capsicum frutescens</i> fruit extract, <i>Capsicum frutescens</i> resin, and capsaicin. | It is concluded that <i>Capsaicin</i> spp' are safe as cosmetics in the practices of use and concentration as described in the safety assessment, when formulated not to be irritating'                                                                                                                                                                                                                                                                                                                              | (+)                     |

Continues

Table S2. Continued.

| Author (year) herb                                                                                      | Aim/quote (where appropriate)                                                                                                                                                                                                                                               | Conclusion/quote                                                                                                                                                                                                                                                                                                                                                                         | Direction of conclusion |
|---------------------------------------------------------------------------------------------------------|-----------------------------------------------------------------------------------------------------------------------------------------------------------------------------------------------------------------------------------------------------------------------------|------------------------------------------------------------------------------------------------------------------------------------------------------------------------------------------------------------------------------------------------------------------------------------------------------------------------------------------------------------------------------------------|-------------------------|
| Keifer (2007) <sup>51</sup><br><i>Mentha piperita</i>                                                   | To undertake 'an evidence-based systematic review including written and statistical analysis of scientific literature, expert opinion, folkloric precedent, history, pharmacology, kinetics/dynamics, interactions, adverse effects, toxicology and dosing [of peppermint]' | 'Reports of adverse reactions are rare but may include hypersensitivity reactions, contact dermatitis, heartburn, perianal burning, bradycardia, and muscle tremor when taken orally'                                                                                                                                                                                                    | (-/+)                   |
| Kienle (2011) <sup>46</sup><br><i>Viscum album</i>                                                      | To systematically review all experiments and clinical studies investigating higher dosages of <i>Viscum album</i> in animals and humans and assessing immune parameters or infections or adverse drug reactions                                                             | 'Application of higher dosages of VAE or ML is not accompanied by immunosuppression; altogether VAE seems to exhibit low risk but should be monitored by clinicians when applied in high dosages'                                                                                                                                                                                        | (-/+)                   |
| Liu (2001) <sup>26</sup><br>Genus<br><i>Phyllanthus</i>                                                 | 'To evaluate the efficacy and safety of genus <i>Phyllanthus</i> for chronic hepatitis B virus (HBV) infection...'                                                                                                                                                          | 'No serious adverse event was reported. Based on this review <i>Phyllanthus</i> species may have positive effect on antiviral activity and liver biochemistry in chronic HBV infection'                                                                                                                                                                                                  | (+)                     |
| Nelsen (2002) <sup>27</sup><br><i>Trifolium pratense</i>                                                | 'The authors systematically review this herb [red clover] in terms of pharmacology, efficacy, safety, side effects, standardization, dosing, toxicology as well as other parameters'                                                                                        | 'Caution should be taken with patients on hormone replacement therapy (HRT) or oral contraceptives (OCs), as red clover binds to intracellular estrogen receptors and may enhance estrogenic effects. Red clover may alter platelet aggregation/contains coumarin, and therefore may theoretically be unsafe in persons with bleeding disorders/coagulopathies or taking anticoagulants' | (-/+)                   |
| Sarma (2008) <sup>28</sup><br><i>Camellia sinensis</i>                                                  | To systematically review 'the safety information for green tea products in order to re-evaluate the current safety class to which these products are assigned'                                                                                                              | '...the safety information for green tea arising from diverse sources provides a signal for the possibility of liver damage caused by products that contain concentrated green tea extracts'                                                                                                                                                                                             | (-/+)                   |
| Savovic (2005) <sup>29</sup><br><i>Ginkgo biloba</i>                                                    | '...to investigate the effects of <i>Ginkgo biloba</i> preparations on blood coagulation parameters'                                                                                                                                                                        | 'Available evidence does not demonstrate that extract of <i>G. biloba</i> causes significant changes in blood coagulation parameters. A limited number of studies on concomitant use of <i>G. biloba</i> with ASA or warfarin also do not suggest that <i>G. biloba</i> has an additive effect to the clinical effects of these two drugs'                                               | (+)                     |
| Sweeney (2005) <sup>30</sup><br><i>Taraxacum officinale</i>                                             | To undertake an evidence-based systematic review of dandelion by the Natural Standard Research Collaboration                                                                                                                                                                | 'Dandelion is generally regarded as safe with rare side effects including contact dermatitis, diarrhea, and gastrointestinal upset'                                                                                                                                                                                                                                                      | (-/+)                   |
| Taibi (2007) <sup>31</sup><br><i>Valeriana officinalis</i>                                              | '...to examine the evidence on the efficacy of valerian as a sleep aid with specific attention to the type of preparations tested and the characteristics of the subjects studied'                                                                                          | 'Overall, the evidence, while supporting that valerian is a safe herb associated with only rare adverse events, does not support the clinical efficacy of valerian as a sleep aid for insomnia'                                                                                                                                                                                          | (+)                     |
| Tiffany (2002) <sup>32</sup><br><i>Hippocastanaceae</i>                                                 | To undertake a multidisciplinary clinical review of horse chestnut                                                                                                                                                                                                          | 'In the future, a longer and adequately powered randomized trial is warranted to compare HCSE [horse chestnut seed extract] to standard of care, and to further assess safety and long-term efficacy'                                                                                                                                                                                    | (+)                     |
| Ulbricht (2003) <sup>33</sup><br><i>Larrea tridentate</i> (DC) Coville,<br><i>Larrea divaricata</i> Cav | 'An evidence-based systematic review including scientific evidence, expert opinion, folkloric precedent, history, pharmacology, kinetics/dynamics, interactions, adverse effects, toxicology, and dosing [of Chapparral]'                                                   | 'Chaparral and NDGA are generally considered unsafe and are not often recommended for use'                                                                                                                                                                                                                                                                                               | (-)                     |
| Ulbricht (2005) <sup>34</sup><br><i>Herbae pulvis standardisatus</i>                                    | To undertake an evidence-based systematic review of belladonna by the Natural Standard Research Collaboration                                                                                                                                                               | 'There is extensive literature on the adverse effects and toxicity of belladonna, related principally to its known anticholinergic actions'                                                                                                                                                                                                                                              | (-)                     |

Continues

Table S2. Continued.

| Author (year) herb                                                | Aim/quote (where appropriate)                                                                                                                                                                                                                                                         | Conclusion/quote                                                                                                                                                                                                                                                                                                                              | Direction of conclusion |
|-------------------------------------------------------------------|---------------------------------------------------------------------------------------------------------------------------------------------------------------------------------------------------------------------------------------------------------------------------------------|-----------------------------------------------------------------------------------------------------------------------------------------------------------------------------------------------------------------------------------------------------------------------------------------------------------------------------------------------|-------------------------|
| Ulbricht (2005) <sup>35</sup><br><i>Melissa officinalis</i> L.    | 'An evidence-based systematic review including written and statistical analysis of scientific literature, expert opinion, folkloric precedent, history, pharmacology, kinetics/dynamics, interactions, adverse effects, toxicology, and dosing [of lemon balm]'                       | 'Lemon balm has been assigned to the FDA Generally Recognized As Safe (GRAS) list in the United States. No serious side effects have been reported, although there is limited research of long-term effects'                                                                                                                                  | (+)                     |
| Ulbricht (2005) <sup>36</sup><br><i>Commifora mukul</i>           | 'To evaluate the scientific evidence on guggul for hyperlipidemia including expert opinion, folkloric precedent, history, pharmacology, kinetics/dynamics, interactions, adverse effects, toxicology, and dosing [of guggul]'                                                         | 'Guggul may cause stomach discomfort or allergic rash as well as other serious side effects and interactions. It should be avoided in pregnant or breast-feeding women and in children. Safety of use beyond 4 months has not been well studied'                                                                                              | (-/+)                   |
| Ulbricht (2005) <sup>37</sup><br><i>Piper methysticum</i>         | 'This systematic review discusses the proposed uses, dosing parameters, adverse effects, toxicology, interactions and mechanism of action of kava'                                                                                                                                    | 'Because kava is not available in many areas of the world, individuals can instead turn to alternative therapies for anxiety treatment'                                                                                                                                                                                                       | (-)                     |
| Ulbricht (2007) <sup>47</sup><br><i>Trigonella foenum-graecum</i> | To undertake 'an evidence-based systematic review including written and statistical analysis of scientific literature, expert opinion, folkloric precedent, history, pharmacology, kinetics/dynamics, interactions, adverse effects, toxicology and dosing [of fenugreek]'            | 'Literature review reveals no reports of clinically significant harmful adverse effects. Fenugreek has traditionally been considered safe and well tolerated'                                                                                                                                                                                 | (+)                     |
| Ulbricht (2007) <sup>38</sup><br><i>Lagerstroemia speciosa</i>    | 'This study is an evidence-based systematic review including written and statistical analysis of scientific literature, expert opinion, folkloric precedent, history, pharmacology, kinetics/dynamics, interactions, adverse effects, toxicology, and dosing [of banaba]'             | 'Banaba is generally considered to be safe when taken orally for 15 days for the treatment of Type II diabetes'                                                                                                                                                                                                                               | (+)                     |
| Ulbricht (2007) <sup>52</sup><br><i>Aloe vera</i>                 | To undertake 'an evidence-based systematic review including written and statistical analysis of scientific literature, expert opinion, folkloric precedent, history, pharmacology, kinetics/dynamics, interactions, adverse effects, toxicology and dosing [of aloe vera]'            | 'Oral aloe products should be used cautiously in patients with diabetes or glucose intolerance, and in patients using glucose-lowering agents. ...Avoid oral aloe latex in patients with renal insufficiency, cardiac disease, electrolyte abnormalities, ileus, acute surgical abdomen, bowel obstruction, fecal impaction, or appendicitis' | (-/+)                   |
| Ulbricht (2008) <sup>53</sup><br><i>Cnicus benedictus</i>         | To undertake 'an evidence-based systematic review including written and statistical analysis of scientific literature, expert opinion, folkloric precedent, history, pharmacology, kinetics/dynamics, interactions, adverse effects, toxicology and dosing [of blessed thistle]'      | 'Blessed thistle is generally considered to be safe when used in recommended doses for short periods of time, with few reported adverse effects. Allergic cross-sensitivity may occur with other members of the Compositae family'                                                                                                            | (+)                     |
| Ulbricht (2009) <sup>39</sup><br><i>Salvia hispanica</i>          | 'To evaluate the scientific evidence on chia ( <i>Salvia hispanica</i> ) including history, folkloric precedent, expert opinion, pharmacology, dosing, interactions, adverse effects, and toxicology. This review serves as a clinical support tool'                                  | 'The preliminary clinical evidence supporting the efficacy of <i>Salvia hispanica</i> in CVD prevention warrants further investigation into its safety and efficacy as a dietary supplement and a functional food'                                                                                                                            | (+)                     |
| Ulbricht (2009) <sup>54</sup><br><i>Perna canaliculus</i>         | To undertake 'an evidence-based systematic review including written and statistical analysis of scientific literature, expert opinion, folkloric precedent, history, pharmacology, kinetics/dynamics, interactions, adverse effects, toxicology, and dosing [of green-lipped mussel]' | 'Green-lipped mussel products have been generally well tolerated in clinical trials. However, possible side effects of <i>Seatone</i> use have been noted by the Australian Rheumatism Association'                                                                                                                                           | (-/+)                   |

Continues

Table S2. Continued.

| Author (year) herb                                                             | Aim/quote (where appropriate)                                                                                                                                                                                                                                                | Conclusion/quote                                                                                                                                                                                                                                                     | Direction of conclusion |
|--------------------------------------------------------------------------------|------------------------------------------------------------------------------------------------------------------------------------------------------------------------------------------------------------------------------------------------------------------------------|----------------------------------------------------------------------------------------------------------------------------------------------------------------------------------------------------------------------------------------------------------------------|-------------------------|
| Ulbricht (2009) <sup>55</sup><br><i>Vaccinium myrtillus</i>                    | To undertake 'an evidence-based systematic review including written and statistical analysis of scientific literature, expert opinion, folkloric precedent, history, pharmacology, kinetics/dynamics, interactions, adverse effects, toxicology, and dosing [of bilberry]'   | The long-term safety and side effects of bilberry have not been extensively studied. Safety is often presumed based on bilberry's history as a food source.                                                                                                          | (+)                     |
| Ulbricht (2010) <sup>56</sup><br><i>Pelargonium sidoides</i>                   | To undertake 'an evidence-based systematic review including written and statistical analysis of scientific literature, expert opinion, folkloric precedent, history, pharmacology, kinetics/dynamics, interactions, adverse effects, toxicology, and dosing [of umckaloabo]' | Use cautiously in patients with liver disease or who are using hepatotoxic agents, anticoagulants or antiplatelets, or in patients with heart conditions, asthma or other respiratory conditions.                                                                    | (-/+)                   |
| Ulbricht (2010) <sup>57</sup><br><i>Mentha spicata</i> , <i>Mentha viridis</i> | To undertake 'an evidence-based systematic review including written and statistical analysis of scientific literature, expert opinion, folkloric precedent, history, pharmacology, kinetics/dynamics, interactions, adverse effects, toxicology, and dosing [of spearmint]'  | 'Avoid with known allergy/hypersensitivity to spearmint or other members of Lamiaceae (Labiatae) family, such as basil, mint, rosemary, sage, savory, marjoram, oregano, thyme, lavender, and perilla'                                                               | (+)                     |
| Ulbricht (2010) <sup>58</sup><br><i>Rosmarinus officinalis</i>                 | To undertake 'an evidence-based systematic review including written and statistical analysis of scientific literature, expert opinion, folkloric precedent, history, pharmacology, kinetics/dynamics, interactions, adverse effects, toxicology, and dosing [of rosemary]'   | 'Based on historical use and available research, it appears that rosemary is well tolerated with few documented cases of adverse events. Avoid with known allergy/hypersensitivity to rosemary, its constituents, or members of the Labiatae or Lamiaceae families'  | (+)                     |
| Ulbricht (2011) <sup>59</sup><br><i>Crocus sativus</i>                         | To undertake 'an evidence-based systematic review including written and statistical analysis of scientific literature, expert opinion, folkloric precedent, history, pharmacology, kinetics/dynamics, interactions, adverse effects, toxicology, and dosing [of saffron]'    | 'Reports of adverse effects are lacking in the available clinical study data. Saffron is likely safe for most individuals when used at levels commonly found in the diet'                                                                                            | (+)                     |
| Ulbricht (2011) <sup>60</sup><br><i>Gymnema sylvestre</i> R. Br.               | To undertake 'an evidence-based systematic review including written and statistical analysis of scientific literature, expert opinion, folkloric precedent, history, pharmacology, kinetics/dynamics, interactions, adverse effects, toxicology, and dosing [of gymnema]'    | Aside from hypoglycemia and potentiation of the effects of hypoglycemic drugs following chronic use of gymnema, no clinically significant adverse effects have been associated with oral gymnema in the available literature, in studies up to 20 months in duration | (+)                     |
| Ulbricht (2011) <sup>61</sup><br><i>Cassia senna</i>                           | To undertake 'an evidence-based systematic review including written and statistical analysis of scientific literature, expert opinion, folkloric precedent, history, pharmacology, kinetics/dynamics, interactions, adverse effects, toxicology, and dosing [of senna]'      | 'Avoid long term use of senna, due to the potential for side effects, some serious'                                                                                                                                                                                  | (-)                     |
| Ulbricht (2010) <sup>40</sup><br><i>Stevia rebaudiana</i>                      | '...to evaluate the scientific evidence on stevia, including expert opinion, folkloric precedent, history, pharmacology, kinetics/dynamics, interactions, adverse effects, toxicology, and dosing'                                                                           | 'Evaluation of two long-term studies (1 and 2 years in length, respectively) indicates that stevia may be effective in lowering blood pressure in hypertensive patients, although data from shorter studies (1-3 months) did not support these findings'             | (-/+)                   |
| Vermaak (2011) <sup>41</sup><br><i>Hoodia gordonii</i>                         | 'This review offers an up-to-date overview of all the current available knowledge pertaining to <i>H. gordonii</i> achieved by systematic analysis of the available literature'                                                                                              | '...the biological activity of all chemical constituents, clinical efficacy, and especially safety are insufficient or completely absent causing great concern as <i>H. gordonii</i> is one of the most widely consumed anti-obesity products of natural origin'     | (-/+)                   |
| West (2006) <sup>42</sup><br><i>Morinda citrifolia</i>                         | 'To describe the safety of this fruit, a literature review and data from new studies are presented'                                                                                                                                                                          | 'Data from clinical studies, toxicity tests, and chemical test have substantiated the use of this juice as a safe food'                                                                                                                                              | (+)                     |

Continues

Table S2. Continued.

| Author (year) herb                              | Aim/quote (where appropriate)                                                             | Conclusion/quote                                                                                                | Direction of conclusion |
|-------------------------------------------------|-------------------------------------------------------------------------------------------|-----------------------------------------------------------------------------------------------------------------|-------------------------|
| Wu (2003) <sup>43</sup><br><i>Curcuma longa</i> | '...to summarize the literature on the safety and anti-inflammatory activity of curcumin' | 'Curcumin has been demonstrated to be safe in six human trials and has demonstrated anti-inflammatory activity' | (+)                     |

FDA, food and drug administration; ML, mistletoe lectins; NDGA, nordihydroguaiaretic acid; NS, not specified; VAC, *Vitex agnus-castus* L.; VAE, *Viscum album* extract. (-/+), moderate safety concerns; (-), major safety concerns; (+), minor or no safety concerns.

Table S3. Examples of excluded systematic reviews.

| Author (year)<br>Country                  | Type of safety concerns | Herbal medicine evaluated                                                                                                                                                                                                                                    | Clinical conditions                                 | Primary data   |                                         |                    | AEs                         |                                                 |           |          | Source of funding |                                                          |                      |               |                          |
|-------------------------------------------|-------------------------|--------------------------------------------------------------------------------------------------------------------------------------------------------------------------------------------------------------------------------------------------------------|-----------------------------------------------------|----------------|-----------------------------------------|--------------------|-----------------------------|-------------------------------------------------|-----------|----------|-------------------|----------------------------------------------------------|----------------------|---------------|--------------------------|
|                                           |                         |                                                                                                                                                                                                                                                              |                                                     | No of reports* | Type                                    | Meta-analysis? SRT | Quality of Overall judgment | Duration                                        | Frequency | Severity |                   | First authors' degree/background                         | Conflict of interest |               |                          |
| Boon (2006) <sup>63</sup><br>Canada       | AEs                     | Essiac<br>Evening primrose oil<br>Garlic<br>Ginger<br>Green tea<br>Lycopen<br>Mistletoe<br><i>Parax ginseng</i><br>Reishi<br>Shiitake<br>Soy<br>Turmeric                                                                                                     | Cancer                                              | 131            | Cohort studies<br>NRCTs<br>RCTs<br>UCTs | No                 | 2                           | Only mild AEs                                   | NM        | NM       | NM                | NM                                                       | Pharmacy             | NM            | NM                       |
| Borrelli (2005) <sup>86</sup><br>Italy    | AEs                     | Ginger ( <i>Zingiber officinale</i> )                                                                                                                                                                                                                        | Pregnancy (not a clinical condition <i>per se</i> ) | 7              | Cohort study<br>RCTs                    | No                 | 4                           | Mild to moderate AEs                            | NM        | NM       | NM                | NM                                                       | PHD                  | NM            | NM                       |
| Cameron (2011) <sup>64</sup><br>Australia | AEs<br>Safety           | Ash bark<br>Aspen bark<br>Aspen leaf<br>Blackcurrant seed oil<br>Borage seed oil<br><i>Boswellia serrata</i><br>Capsaicin<br>Cat's claw<br>Evening primrose oil<br>Feverfew<br>Golden rod herb<br>TCR<br>TKR<br><i>Tripterygium wilfordii</i><br>Willow bark | RA                                                  | 22             | RCTs                                    | No                 | 5                           | Only mild AEs<br>Moderate to severe AEs for TGV | NM        | NM       | NM                | Mild to severe for TGV<br>Mild to moderate for other HMs | Exercise science     | None declared | None declared (external) |

Continues

Table S3. Continued.

| Author (year)<br>Country                                    | Type of safety<br>concerns | Herbal medicine<br>evaluated              | Clinical<br>conditions     | Primary data      |      | AEs                               |                        |          |                                                                                                                                                                                                                                                                                                      |          | Source of<br>funding |                                         |                         |                                                                                                                             |
|-------------------------------------------------------------|----------------------------|-------------------------------------------|----------------------------|-------------------|------|-----------------------------------|------------------------|----------|------------------------------------------------------------------------------------------------------------------------------------------------------------------------------------------------------------------------------------------------------------------------------------------------------|----------|----------------------|-----------------------------------------|-------------------------|-----------------------------------------------------------------------------------------------------------------------------|
|                                                             |                            |                                           |                            | No of<br>reports* | Type | Quality of<br>Overall<br>judgment | Meta-<br>analysis? SRT | Duration | Frequency                                                                                                                                                                                                                                                                                            | Severity |                      | First authors'<br>degree/<br>background | Conflict of<br>interest |                                                                                                                             |
| Canter (2006) <sup>67</sup><br>UK                           | AEs                        | TGV ( <i>Tripterygium<br/>wilfordii</i> ) | RA                         | 2                 | RCT  | Moderate to<br>severe AEs         | No                     | 5        | Death after<br>1 month                                                                                                                                                                                                                                                                               | n NM.m.  | Mild to<br>severe    | PHD                                     | NM                      | NM                                                                                                                          |
| Chen (2007) <sup>65</sup><br>People's Republic<br>of China  | AEs<br>Safety              | TCR                                       | Influenza                  | 2                 | RCTs | Mild to<br>moderate AEs           | No                     | 5        | GI upset                                                                                                                                                                                                                                                                                             | NM       | NM                   | Epidemiology                            | None declared           | Chinese<br>Medical Board<br>of New York<br>(CMB), USA                                                                       |
| Cheng (2009) <sup>66</sup><br>People's Republic<br>of China | AEs<br>Safety              | TCR                                       | Functional<br>constipation | 35                | RCTs | Only mild AEs                     | Yes                    | 5        | Abdominal pain<br>Diarrhoea                                                                                                                                                                                                                                                                          | NM       | NM                   | TGM                                     | NM                      | Health and<br>Health Services<br>Research Fund<br>of<br>Hong Kong<br>Health, Welfare<br>and Food<br>Bureau, No.<br>05060161 |
| Chung (2006) <sup>67</sup><br>People's Republic<br>of China | AEs                        | Cannabis<br>TCR<br>TIR                    | Parkinson's<br>disease     | 9                 | RCTs | Mild to<br>moderate AEs           | No                     | 5        | Altered taste<br>Confusion<br>Constipation<br>Cystitis<br>Detachment<br>Diarrhoea/loose stool<br>Dizziness<br>Dry mouth<br>Forgetfulness<br>Lethargy<br>Mild dizziness<br>Nausea<br>Musculoskeletal<br>Pain<br>Paranoia<br>Poor concentration<br>Urinary tract infection<br>Vivid dreams<br>Vomiting | NM       | Mild                 | BSc                                     | NM                      | Research grants<br>of Hong Kong<br>Baptist<br>University and<br>Eu Yan Sang Ltd                                             |

Continues

Table S3. Continued.

| Author (year)<br>Country                                  | Type of safety<br>concerns | Herbal medicine<br>evaluated                                                                                                                                                                                                                                                                                                          | Clinical<br>conditions                           | Primary data      |                                                                  |                           | AEs                            |                       |                                                                                                                                                                  |                                            |          | Source of<br>funding |                                         |                                                                                                                                   |                                                                                                                                    |
|-----------------------------------------------------------|----------------------------|---------------------------------------------------------------------------------------------------------------------------------------------------------------------------------------------------------------------------------------------------------------------------------------------------------------------------------------|--------------------------------------------------|-------------------|------------------------------------------------------------------|---------------------------|--------------------------------|-----------------------|------------------------------------------------------------------------------------------------------------------------------------------------------------------|--------------------------------------------|----------|----------------------|-----------------------------------------|-----------------------------------------------------------------------------------------------------------------------------------|------------------------------------------------------------------------------------------------------------------------------------|
|                                                           |                            |                                                                                                                                                                                                                                                                                                                                       |                                                  | No of<br>reports* | Type                                                             | Meta-<br>analysis?<br>SRT | Quality of Overall<br>judgment | Type/clinical outcome | Duration                                                                                                                                                         | Frequency                                  | Severity |                      | First authors'<br>degree/<br>background | Conflict of<br>interest                                                                                                           |                                                                                                                                    |
| Coon (2004) <sup>88</sup><br>UK                           | AEs                        | <i>Andragraphis<br/>paniculata</i>                                                                                                                                                                                                                                                                                                    | Upper respiratory tract infections               | 11                | Phase I trial<br>RCTs                                            | No                        | 4                              | Only mild AEs         | Allergic reactions<br>Bad taste in mouth<br>Chest pain<br>Diarrhoea<br>Dizziness<br>Drowsiness<br>Fatigue<br>Headache<br>Heartburn<br>Nausea<br>Rash<br>Vomiting | NM                                         | NM       | Mild                 | PHD                                     | NM                                                                                                                                | Fellowship from<br>Pharmaton SA,<br>Lugano,<br>Switzerland                                                                         |
| Cui (2010) <sup>68</sup><br>People's Republic<br>of China | AEs<br>Safety              | TCR                                                                                                                                                                                                                                                                                                                                   | Degenerative disc disease with chronic neck pain | 4                 | RCTs                                                             | No                        | 5                              | Mild to moderate AEs  | Watery stool<br>Abdominal pain<br>Stomach ache<br>Pruritus<br>Reddish skin<br>Small blisters on<br>Skin                                                          | 30 minute                                  | NM       | NM                   | TGM                                     | State<br>Administration<br>of Traditional<br>Chinese<br>Medicine of the<br>People's<br>Republic of<br>China (06-<br>07/Q05)       | State<br>Administration<br>of Traditional<br>Chinese<br>Medicine of the<br>People's<br>Republic of<br>China (06-<br>07/Q05), China |
| Ernst (2002) <sup>69</sup><br>UK                          | AEs                        | <i>Agnus castus</i><br>Alcoholic herbal<br>tincture<br>Blue cohosh<br>Castor oil<br>Dong quai<br>Echinacea<br>German herbal<br>mixture<br>Ginseng<br><i>Montanoa<br/>tomentosa</i><br><i>Polygonum<br/>multiflorum</i> ,<br>Pyrolizidine<br>alkaloids<br>Raspberry leaf<br>St John's wort<br>TCR<br><i>Tripterygium<br/>wilfordii</i> | NS                                               | 22                | CRS<br>CS<br>Retrospective<br>surveys<br>Epidemiology<br>surveys | No                        | 3                              | Mild to moderate AEs  | Abortifacient<br>Birth defects<br>Emmanagogue<br>Low birth weight (fetus)<br>Mutagenic<br>Oxytocic action<br>Premature birth                                     | Several<br>weeks (after<br>blue<br>cohosh) | NM       | NM                   | MD<br>PHD<br>FRCP                       | State<br>Administration<br>of Traditional<br>Chinese<br>Medicine of the<br>People's<br>Republic of<br>China (06-<br>07/Q05)<br>NM | NM                                                                                                                                 |
| Flower (2009) <sup>70</sup><br>UK                         | AEs<br>Safety              | TCR                                                                                                                                                                                                                                                                                                                                   | Endometriosis                                    | 2                 | RCTs                                                             | Yes                       | 5                              | Only mild AEs         | Acne<br>Dry mouth<br>Rectal tenesmus<br>Weight gain                                                                                                              | NM                                         | NM       | Mild                 | CAM                                     | None declared                                                                                                                     | Complementary<br>Medicine<br>Research Unit,<br>UK                                                                                  |

Continues



Table S3. Continued.

| Author (year)<br>Country                                 | Type of safety<br>concerns | Herbal medicine<br>evaluated                                                                                                                                                                                                                                                                                                                | Clinical<br>conditions                                                                                                                                     | Primary data      |              | AEs                             |                               |                         |          |                                         |                         | Source of<br>funding |                                                                                                                                                                                                                 |
|----------------------------------------------------------|----------------------------|---------------------------------------------------------------------------------------------------------------------------------------------------------------------------------------------------------------------------------------------------------------------------------------------------------------------------------------------|------------------------------------------------------------------------------------------------------------------------------------------------------------|-------------------|--------------|---------------------------------|-------------------------------|-------------------------|----------|-----------------------------------------|-------------------------|----------------------|-----------------------------------------------------------------------------------------------------------------------------------------------------------------------------------------------------------------|
|                                                          |                            |                                                                                                                                                                                                                                                                                                                                             |                                                                                                                                                            | No of<br>reports* | Type         | Meta-<br>analysis? <sup>1</sup> | Quality of<br>SRT<br>judgment | Frequency               | Severity | First authors'<br>degree/<br>background | Conflict of<br>interest |                      |                                                                                                                                                                                                                 |
| Frazier (2009) <sup>84</sup>                             | Toxicity                   | <i>Attractylis gummifera</i><br>Black cohosh<br>Boh-Gol-Zhee<br>Camphor<br><i>Centella asiatica</i><br>Chaparral leaf<br>Chaso<br>Comfrey<br>Fu Fang Qing<br>Germander<br>Golden germander<br>Greater celandine<br>Jin Bu Huan<br>Kava<br>Linghzi<br>Ma huang<br>Senna<br>Sho-saiko-to<br>Skullcap<br><i>Teucrium capitatum</i><br>Valerian | Anxiety<br>Bone disorders<br>Insomnia<br>(intended use)<br>Leprosy<br>Menopausal<br>symptoms<br>Rheumatism<br>Weight loss to<br>chronic viral<br>hepatitis | NM                | NM           | No                              | 1                             | Mild to<br>moderate AEs | NM       | NM                                      | MD                      | None declared        | NM                                                                                                                                                                                                              |
| Guo (2006) <sup>71</sup> UK                              | AEs<br>Safety              | Panax ginseng<br>TCR                                                                                                                                                                                                                                                                                                                        | COPD                                                                                                                                                       | 14                | RCTs         | No                              | 5                             | Mild to<br>moderate AEs | NM       | NM                                      | PHD                     | NM                   | Bionorica AG,<br>Neumarkt,<br>Germany                                                                                                                                                                           |
| Liu (2009) <sup>72</sup><br>Peoples Republic of<br>China | AEs<br>Safety              | TCR                                                                                                                                                                                                                                                                                                                                         | Drug<br>dependence<br>(heroin<br>detoxification)                                                                                                           | 21                | RCTs         | Yes                             | 4                             | Only mild AEs           | NM       | NM                                      | MD                      | NM                   | National Basic<br>Research<br>Program of<br>China (973<br>Program,<br>2003CB515400),<br>the National<br>High Technology<br>Research and<br>Development<br>Program of<br>China (863<br>Program,<br>2006AA02Z4D1) |
| Martin (2004) <sup>73</sup><br>UK                        | AEs<br>Safety              | Bitter orange oil<br><i>Solanum</i><br><i>chrysochlorum</i> Schidl/<br><i>Solanum nigrescens</i><br>Tea tree oil                                                                                                                                                                                                                            | Fungal infections                                                                                                                                          | 7                 | NRCT<br>RCTs | No                              | 4                             | Only mild AEs           | NM       | NM                                      | PHD                     | NM                   | Fellowship from<br>Boots<br>Company,<br>Nottingham, UK                                                                                                                                                          |

Continues

Table S3. Continued.

| Author (year)<br>Country                         | Type of safety<br>concerns | Herbal medicine<br>evaluated                                                                                                                                                                                 | Clinical<br>conditions                     | Primary data      |                                                 |                           | AEs                            |                         |                                                                                                                                                                                                                                                           |                                |          | Source of<br>funding                                                  |                                         |                         |                                                                                                                                            |
|--------------------------------------------------|----------------------------|--------------------------------------------------------------------------------------------------------------------------------------------------------------------------------------------------------------|--------------------------------------------|-------------------|-------------------------------------------------|---------------------------|--------------------------------|-------------------------|-----------------------------------------------------------------------------------------------------------------------------------------------------------------------------------------------------------------------------------------------------------|--------------------------------|----------|-----------------------------------------------------------------------|-----------------------------------------|-------------------------|--------------------------------------------------------------------------------------------------------------------------------------------|
|                                                  |                            |                                                                                                                                                                                                              |                                            | No of<br>reports* | Type                                            | Meta-<br>analysis?<br>SRT | Quality of Overall<br>judgment | Type/clinical outcome   | Duration                                                                                                                                                                                                                                                  | Frequency                      | Severity |                                                                       | First authors'<br>degree/<br>background | Conflict of<br>interest |                                                                                                                                            |
| May (2009) <sup>74</sup><br>Australia            | AEs<br>Safety              | <i>Melissa officinalis</i><br><i>Salvia officinalis</i><br>TCR                                                                                                                                               | Dementia                                   | 13                | RCTs                                            | Yes                       | 5                              | Only mild AEs           | Abdominal pain<br>Abdominal distension<br>Agitation<br>Appetite loss<br>Belching<br>Decrease of appetite<br>Diarrhoea<br>Dizziness<br>Liver dysfunction (unspecified<br>in which group)<br>Nausea<br>Oral bitterness<br>Urticaria<br>Vomiting<br>Wheezing | NM                             | NM       | Mild                                                                  | TCM                                     | NM                      | Australian<br>Postgraduate<br>Award                                                                                                        |
| Mehri (2011) <sup>89</sup><br>IRA                | AEs<br>Safety              | Stinging nettle<br>( <i>Urtica dioica</i> )                                                                                                                                                                  | Diabetes                                   | 1                 | Clinical<br>analysis                            | No                        | 5                              | Only mild AEs           | NM                                                                                                                                                                                                                                                        | NM                             | NM       | NM                                                                    | Pharmacy                                | NM                      | None declared                                                                                                                              |
| Naser (2011) <sup>83</sup><br>Germany            | Toxicity                   | Black cohosh                                                                                                                                                                                                 | Menopausal<br>symptoms                     | 5                 | RCTs                                            | Yes                       | 0                              | Only mild AEs           | NM                                                                                                                                                                                                                                                        | NM                             | NM       | NM                                                                    | MD                                      | Yes, potential          | First author is an<br>employee of<br>Schaper &<br>Brummer GmbH<br>& Co. KG,<br>manufacturer<br>of isopropanolic<br>black cohosh<br>extract |
| Pittler (2003) <sup>1</sup><br>UK                | Toxicity                   | Aristolochia<br>Bajaolan<br>Cascara sagrada<br>Celandine<br>Chaparral<br>Germander<br>Jin bu Huan<br>Kava<br>Ma huang<br>Pennyroyal<br>Senna<br>Skullcap<br>TCR                                              | Various (from<br>asthma to weight<br>loss) | 52                | Various<br>(clinical and<br>laboratory<br>data) | No                        | 5                              | Mild to<br>moderate AEs | From transient elevations of<br>liver enzyme levels to<br>fulminant liver failure and<br>death                                                                                                                                                            | Once only-<br>several<br>years | NM       | Yes (severe<br>acute liver<br>failure)                                | MD<br>PHD                               | NM                      | NM                                                                                                                                         |
| Pittler (2004) <sup>90</sup><br>UK <sup>90</sup> | AEs                        | Feverfew<br>( <i>Tanacetum<br/>parthenium</i> L.)                                                                                                                                                            | Migraine                                   | 5                 | RCTs                                            | No                        | 5                              | Only mild AEs           | GI symptoms<br>Mouth ulceration                                                                                                                                                                                                                           | NM                             | NM       | Mild and<br>reversible                                                | MD<br>PHD                               | None declared           | None declared                                                                                                                              |
| Pittler (2005) <sup>75</sup><br>UK               | AEs                        | <i>Ephedra sinica</i><br><i>Garcinia cambogia</i><br>Guar gum<br><i>Ilex</i><br><i>Paulinia cupana</i><br><i>Pausinystalia</i><br><i>yo-himbe</i> <i>Plantago</i><br><i>psyllium</i><br><i>paraguayensis</i> | NS                                         | 80                | Largely<br>anecdotal                            | No                        | 5                              | Mild to<br>moderate AEs | Death<br>Hepatic injury<br>Heart palpitation<br>Risk of psychiatric, autonomic<br>or GI AE                                                                                                                                                                | NM                             | NM       | Severe<br>diarrhoea<br>(after<br><i>Plantago</i><br><i>psyllium</i> ) | MD<br>PHD                               | NM                      | NM                                                                                                                                         |

Continues

Table S3. Continued.

| Author (year)<br>Country                                       | Type of safety<br>concerns | Herbal medicine<br>evaluated                                                                                                                                                                                                        | Clinical<br>conditions            | Primary data      |                     | Meta-<br>analysis?<br>SRT | Quality of Overall<br>judgment | AEs                     |          |           |          |    | First authors'<br>degree/<br>background | Conflict of<br>interest | Source of<br>funding |
|----------------------------------------------------------------|----------------------------|-------------------------------------------------------------------------------------------------------------------------------------------------------------------------------------------------------------------------------------|-----------------------------------|-------------------|---------------------|---------------------------|--------------------------------|-------------------------|----------|-----------|----------|----|-----------------------------------------|-------------------------|----------------------|
|                                                                |                            |                                                                                                                                                                                                                                     |                                   | No of<br>reports* | Type                |                           |                                | Type/clinical outcome   | Duration | Frequency | Severity |    |                                         |                         |                      |
| Qin (2011)<br>Peoples Republic of<br>China <sup>31</sup>       | AEs                        | TCR<br>(Free and Easy<br>Wanderer Plus)                                                                                                                                                                                             | Depression                        | 14                | RCTs                | Yes                       | 5                              | Only mild AEs           | NM       | NM        | NM       | NM | Regenerative<br>medicine                | None declared           | None declared        |
| Rathbone (2007) <sup>76</sup><br>UK                            | AEs, safety                | TCR                                                                                                                                                                                                                                 | Schizophrenia                     | 7                 | RCTs                | Yes                       | 5                              | Only mild AEs           | NM       | NM        | NM       | NM | Psychiatry                              | None declared           | NM                   |
| Setty (2005) <sup>82</sup>                                     | AEs and<br>toxicity        | American, common<br>or holy basil<br>Cat's claw<br>Crack<br>Devil's claw<br>Evening primrose<br>Feverfew<br>Ginger<br>Purple, white or<br>violet willow<br>Stinging nettle<br>Thunder god vine<br><i>Tripterygium<br/>wilfordii</i> | Rheumatic<br>diseases             | 70                | Mostly very<br>good | No                        | -1                             | Mild to<br>moderate AEs | NM       | NM        | NM       | NM | MD                                      | NM                      | NM                   |
| Shi (2008) <sup>77</sup>                                       | AEs                        | TCR<br>TTR                                                                                                                                                                                                                          | IBS                               | 22                | Good                | Yes                       | 5                              | Mild to<br>moderate AEs | NM       | NM        | NM       | NM | Chinese<br>medicine                     | NM                      | NM                   |
| Tu (2009) <sup>78</sup><br>Peoples Republic of Safety<br>China | AEs                        | TCR                                                                                                                                                                                                                                 | Dysfunctional<br>uterine bleeding | 4                 | QRCT<br>RCTs        | Yes                       |                                | Only mild AEs           | NM       | NM        | NM       | NM | TCM                                     | NM                      | NM                   |

Continues

Table S3. Continued.

| Author (year)<br>Country              | Primary data            |                           |                                  |                | AEs                                                         |                    |                             |                        | Source of funding                                                                                                                                                                                                                                                                                                                                   |          |           |          |                                  |                                                                                      |
|---------------------------------------|-------------------------|---------------------------|----------------------------------|----------------|-------------------------------------------------------------|--------------------|-----------------------------|------------------------|-----------------------------------------------------------------------------------------------------------------------------------------------------------------------------------------------------------------------------------------------------------------------------------------------------------------------------------------------------|----------|-----------|----------|----------------------------------|--------------------------------------------------------------------------------------|
|                                       | Type of safety concerns | Herbal medicine evaluated | Clinical conditions              | No of reports* | Type                                                        | Meta-analysis? SRT | Quality of Overall judgment | Type/clinical outcome  |                                                                                                                                                                                                                                                                                                                                                     | Duration | Frequency | Severity | First authors' degree/background | Conflict of interest                                                                 |
| Ulbricht (2009) <sup>80</sup><br>USA  | AEs                     | Essiac                    | NM                               | 19             | Anecdotal reports<br>CR<br>CS<br>Unpublished investigations | No                 | 1                           | Moderate to severe AEs | Allergies<br>Anaphylaxis<br>Arrhythmias<br>Atonic colon<br>Bradycardia<br>Cardiac toxicity<br>Colic<br>Dermatitis<br>Diarrhoea<br>Extensive hepatic necrosis<br>Haematuria<br>Hypokalaemia<br>Nausea<br>Neuromuscular dysfunction<br>Pain<br>Seizure<br>Severe metabolic acidosis with subsequent hepatic failure and neonatal jaundice<br>Vomiting | NM       | NM        | PharmD   | NM                               | None declared                                                                        |
| Vogler (1999) <sup>91</sup><br>UK     | AEs                     | <i>Aloe vera</i>          | Diabetes and hyperlipidaemia     | 10             | CCT<br>RCTs                                                 | No                 | 4                           | Mild to moderate AEs   | Burning (topical application)<br>Contact dermatitis<br>Mild itching                                                                                                                                                                                                                                                                                 | NM       | Mild      | PHD      | NM                               | NM                                                                                   |
| Zhu (2008) <sup>79</sup><br>Australia | AEs                     | TCR                       | Women with primary dysmenorrhoea | 39             | RCTs                                                        | Yes                | 5                           | Only mild AEs          | 'No significant adverse effects were identified'                                                                                                                                                                                                                                                                                                    | NM       | NM        | CAM      | Yes                              | University of Western Sydney and Cochrane Menstrual Disorders and Subfertility Group |

AE, adverse effect; AIDS, acquired immune deficiency syndrome; BSc, Bachelor of Science; CAM, complementary and alternative medicine; CCT, controlled clinical trial; COPD, chronic obstructive pulmonary disease; CYP3A, cytochrome P450 3A; CR, case report; CS, case series; CVD, cardiovascular disease; HBV, hepatitis B virus; HFS, herbal food supplements; HM, herbal medicines; GI, gastrointestinal; IBS, irritable bowel syndrome; MD, Doctor of Medicine; NM, not mentioned; NRCT, non-randomized controlled trial; NS, not specified; OA, osteoarthritis; PharmD, Doctor of Pharmacy; PHD, Doctor of Philosophy; PMS, premenstrual syndrome; QRCT, quasi-randomized controlled trial; RA, rheumatoid arthritis; RCT, randomized controlled trial; RRC, retrospective review of cases; SR, systematic review; SRS, spontaneous reporting scheme; TAR, traditional Arab remedies; TCM, traditional Chinese medicine; TCR, traditional Chinese remedies; TCR, traditional Chinese remedies; TIR, traditional Indian remedies; TKR, traditional Korean remedies; TTR, traditional Tibetan remedies; UCT, uncontrolled trial.

\*Range of primary data.  
†Total number of patients experiencing AEs, if estimable.

‡Scoring: each question is scored as 1, 0 or -1; a score of ≤0 means the review has major flaws, 1-2 means minor flaws and 3-5 means minimal or no flaws; 1 means that: (a) the review states the databases used, the date of the most recent searches and includes some mention of search terms; (b) the review searches at least two databases and looks at other sources; (c) the review states in the overview the criteria used for deciding which studies to include; (d) the review reports how many studies were identified by searches, the numbers of studies excluded and the appropriate reasons for excluding them; (e) the conclusions made by the author(s) are supported by the data and/or analysis reported in the review. 0 means that the above-mentioned criteria were partially fulfilled; and -1 means that none of the above criteria were fulfilled. This is an operationalisation of the Oxman criteria,<sup>11</sup> adapted from Ernst et al (2011).<sup>10</sup>
